# Supplementary material
Source: PubMed Central journal article supplement (PMC8452151)
Supplement: NIHMS1739874-supplement-1.pdf [file NIHMS1739874-supplement-1.pdf]

# Common Experimental Approaches for Systems Analysis of Immune Response Signaling Networks (1/2)

| Method                                                                                             | Information gained                           | Pathway components interrogated                                                     | Resolution             | Degree of multiplexing                                   | Quantitation, reliability, sensitivity                                                                                                                                    | Data generation challenges                                                                                                                                            | Data interpretation challenges                                                                                                                            | Example protocol or study reference                                                                                         |
|----------------------------------------------------------------------------------------------------|----------------------------------------------|-------------------------------------------------------------------------------------|------------------------|----------------------------------------------------------|---------------------------------------------------------------------------------------------------------------------------------------------------------------------------|-----------------------------------------------------------------------------------------------------------------------------------------------------------------------|-----------------------------------------------------------------------------------------------------------------------------------------------------------|-----------------------------------------------------------------------------------------------------------------------------|
| <b>Flow Cytometry of cell surface proteins</b>                                                     | Protein abundance, internalization kinetics  |    | Single cell snapshot   | Multi-analyte (typically <10, more possible with Cy-TOF) | Relative quantitation (protein abundance/cell), absolute quantitation (fraction of cells expressing specific protein); sensitivity depends on antibody quality and probe. | Flow cytometer, specific antibodies against proteins of interest required; need to optimize fluorescence panel.                                                       | Fluorescence compensation if using multi-color panel; gating strategies and multi-dimensional analysis.                                                   | Yu et al., 2016, PMID: 26938654. Rigo and Vinante, 2017, PMID: 27342211.                                                    |
| <b>Co-immunoprecipitation (Co-IP), + Western Blotting or + Mass Spec</b>                           | Protein-protein interactions                 |    | Bulk                   | Typically single analyte, but can be linked to mass spec | Relative quantitation; not reliable for weak or transient interactions.                                                                                                   | High specificity, high affinity antibodies required; need to optimize precise experimental conditions; time-intensive.                                                | Potential for artefact requires good negative and positive controls. Not clear whether association is direct or indirect.                                 | Tang and Takahashi, 2018, PMID: 29855966.                                                                                   |
| <b>In situ Proximity Ligation Assay (PLA) with microscopy</b>                                      | Protein-protein interactions                 |    | Single cell snapshot   | Single analyte                                           | Absolute quantitation of complexes possible; high sensitivity.                                                                                                            | Fluorescence microscope, antibodies against both proteins required; need to optimize experimental conditions.                                                         | Automated cell segmentation and spot count.                                                                                                               | Hegazy et al., 2020, PMID: 33044803.                                                                                        |
| <b>(Phospho-) proteomics by Mass Spectrometry using labeling (e.g. SILAC)</b>                      | Protein abundance, Protein activation        |    | Bulk                   | 'omic                                                    | Relative quantitation; high accuracy.                                                                                                                                     | Mass Spec required; chromatography for fractionation and phosphopeptide enrichment; very time-intensive; only applicable to metabolically active model systems.       | Peptide identification using databases and commercial software; correct analysis of pooled samples; time-intensive.                                       | Rathore and Nita-Lazar, 2020, PMID: 32936995. Ankney et al., 2018, PMID: 29894226.                                          |
| <b>(Phospho-) proteomics by Mass Spectrometry using peptide spike-in (e.g. AQUA)</b>               | Protein abundance, Protein activation        |    | Bulk                   | Single analyte, multi-analyte                            | Absolute quantitation; high accuracy.                                                                                                                                     | Mass Spec required; stable isotope labeled synthetic peptides for proteins of interest required; time-intensive.                                                      | Peptide identification using databases and commercial software.                                                                                           | Ankney et al., 2018, PMID: 29894226. Kirkpatrick et al., 2005, PMID: 15722223.                                              |
| <b>Immuno-blotting (for phospho-proteins)</b>                                                      | Protein abundance, Protein activation        |    | Bulk                   | Single analyte, (multi-analyte possible)                 | Relative quantitation; dependent on skilled protocol implementation; sensitivity varies with antibody affinity and detection chemistry.                                   | High specificity antibodies required; need to optimize experimental conditions: knowledge about phosphorylation sites; time-intensive.                                | Need to determine dynamic range of antibody; appropriate loading; correct band identification; careful normalization, etc.                                | Pillai-Kastoori et al., 2020, PMID: 32007473. Esser-Nobis et al., 2020, PMID: 32571931.                                     |
| <b>Protein turnover assays (e.g. pulse-chase (P-C), cycloheximide (CHX) inhibition, Mass Spec)</b> | Protein half-life/ degradation               |    | Bulk                   | 'omic (mass spec), targeted (pulse-chase, CHX, etc.)     | Rate constants can be determined from relative abundance measurements; mass spec: high sensitivity, CHX: low sensitivity.                                                 | Metabolically active system required; classical P-C requires IP, radioactivity; CHX induces cell stress; mass spec: sample complexity, much input material required.  | Accurate calculation of turnover rate; mass spec: peptide identification using databases across time points; Validation of measured rates often required. | Hinkson and Elias, 2011, PMID: 21474317.                                                                                    |
| <b>Kinase activity assays</b>                                                                      | Protein activity                             |  | Bulk                   | Single-analyte                                           | Absolute quantitation possible (nmole of phosphate incorporated/min); good sensitivity and accuracy.                                                                      | Radioactivity required; high quality protein preparation/IP required; time-intensive; need to determine linear range of kinase.                                       | Calculating the kinase activity for true quantitation is not easy.                                                                                        | Hastie et al., 2006, PMID: 17406331.                                                                                        |
| <b>Live-cell Microscopy</b>                                                                        | Subcellular localization of protein          |  | Single cell time-lapse | Single analyte, multi-analyte                            | Relative quantitation; dynamic range strongly dependent on reporter protein design.                                                                                       | Cells with fluorescently-tagged reporters required; advanced microscope with live cell incubator and multi-position automated time series image acquisition required. | Accurate image segmentation and reporter quantification pipeline required; need to relate localization to activity.                                       | Kudo et al., 2018, PMID: 29266096; Regot et al., 2014, PMID: 24949979; Adelaja et al., 2021, DOI: 10.1101/2020.05.23.11286. |
| <b>Electrophoretic Mobility Shift Assay (EMSA)</b>                                                 | DNA-protein interactions, protein activation |  | Bulk                   | Single analyte                                           | Good but relative quantitation of DNA binding activity, and composition of the DNA binding complex.                                                                       | Radioactivity required; phosphor-imager required; time-intensive.                                                                                                     | Quantitation procedure and appropriate controls are well established.                                                                                     | Juvekar et al., 2012, PMID: 22113267.                                                                                       |
| <b>TransAM® assay</b>                                                                              | DNA protein interactions, protein activation |  | Bulk                   | Single analyte                                           | Relative quantitation, absolute quantitation possible; high sensitivity.                                                                                                  | High costs for kits; commercial kit for TF of interest needs to be available.                                                                                         | Data analysis is standardized, but determining the complex composition is a challenge.                                                                    | Challis et al., 2006, DOI: 10.1038/nmeth907.                                                                                |

# Common Experimental Approaches for Systems Analysis of Immune Response Signaling Networks (2/2)

| Method                                                                          | Information gained       | Pathway components interrogated                                                     | Resolution           | Degree of multiplexing                            | Quantitation, reliability, sensitivity.                                                                                                     | Data generation challenges                                                                                                                                                                       | Data interpretation challenges                                                                                                                                                    | Example protocol or study reference                                                                               |
|---------------------------------------------------------------------------------|--------------------------|-------------------------------------------------------------------------------------|----------------------|---------------------------------------------------|---------------------------------------------------------------------------------------------------------------------------------------------|--------------------------------------------------------------------------------------------------------------------------------------------------------------------------------------------------|-----------------------------------------------------------------------------------------------------------------------------------------------------------------------------------|-------------------------------------------------------------------------------------------------------------------|
| <b>Bulk epigenetic assays, e.g. ATACseq, ChIP-Seq, CUT&amp;RUN, CUT&amp;Tag</b> | Chromatin state          |    | Bulk                 | 'omic                                             | Relative quantitation; ChIP-Seq, C&R, C&T: normalized to background or spike-in control.                                                    | High cost; ChIP-Seq, C&R, C&T require high specificity, high affinity antibodies; optimization of protocol to cell types; ChIP-Seq: large number of cells required.                              | Next Gen Sequencing data processing/ interpretation; may need to develop new algorithms for analysis.                                                                             | Buenrostro et al., 2013, PMID: 24097267. Corces et al., 2017, PMID: 28846090. Skene et al., 2017, PMID: 28079019. |
| <b>Single cell epigenetic assays, e.g. ATACseq, CUT&amp;Tag</b>                 | Chromatin state          |    | Single cell snapshot | 'omic                                             | Relative quantitation; C&T: normalized to background or spike-in control; some dropout events common.                                       | High cost; separating cells; C&T require high specificity, high affinity antibodies; need to optimize protocol for each condition.                                                               | High dimensional data; batch effects; dropouts and sparsity; technical noise vs. biological effects.                                                                              | Buenrostro et al., 2015, PMID: 26083756. Kaya-Okur et al., 2019, PMID: 31036827.                                  |
| <b>Sequencing of Intron-Containing RNA (e.g. caRNA-Seq, total RNA Seq)</b>      | Abundance of nascent RNA |    | Bulk                 | 'omic                                             | Relative quantitation; low sensitivity; accurate quantitation difficult due to variable intron excision rates across time course and genes. | High costs for library kits and Next Gen Sequencing.                                                                                                                                             | 'omic data processing/ interpretation; caRNA-Seq: non-linear quantitation, some non-nascent RNA species also sequenced.                                                           | Wissink et al., 2019, PMID: 31399713.                                                                             |
| <b>qRT-PCR</b>                                                                  | RNA abundance            |    | Bulk                 | Single analyte                                    | Relative quantitation; absolute quantitation possible using standard.                                                                       | qRT-PCR instrument required; entry level skill sets.                                                                                                                                             | Appropriate normalization; standard methods.                                                                                                                                      | Forlenza et al., 2012, PMID: 22131023.                                                                            |
| <b>Bulk mRNA Sequencing</b>                                                     | mRNA abundance           |    | Bulk                 | 'omic                                             | Relative quantitation; absolute quantitation with spike-ins.                                                                                | High costs for library kits and Next Gen Sequencing.                                                                                                                                             | 'omic data processing/ interpretation.                                                                                                                                            | Su et al., 2014, PMID: 25150838. Kukurba et al., 2015, PMID: 25870306.                                            |
| <b>Single cell mRNA Sequencing</b>                                              | mRNA abundance           |    | Single cell snapshot | 'omic or targeted multi-analyte                   | Absolute quantitation possible with UMI-based approaches; some dropout genes common.                                                        | Very high costs for kits or service; separating cells; maintaining cell health during assay; access to cell capture device and sequencing core.                                                  | High dimensionality data; batch effects; dropouts and sparsity; technical noise vs biological effects.                                                                            | Shalek et al., 2014, PMID: 24919153. Luecken et al., 2019, PMID: 31217225.                                        |
| <b>Fluorescence In Situ Hybridization (FISH), e.g. MERFISH</b>                  | RNA abundance            |    | Single cell snapshot | Multi-analyte                                     | Absolute quantitation of mRNA spots; high sensitivity.                                                                                      | Good resolution fluorescence microscope required; If multiplexed: microfluidics required, time-intensive, complex protocol, correct hybridization probe design, feasible sample size is limited. | Cell segmentation, automated quantitation of RNA spots; If multiplexed: optical crowding of RNA spots esp. for highly expressed genes, analysis and interpretation is challenging | Chen et al., 2015, PMID: 25858977. Xia et al., 2019, PMID: 31118500.                                              |
| <b>Metabolite Analysis by Mass Spectrometry</b>                                 | Metabolic state          |    | Bulk                 | Omics, (single analyte for absolute quantitation) | Relative quantitation; absolute quantitation possible using spike-ins; high sensitivity.                                                    | Mass spec required.                                                                                                                                                                              | Optimizing parameters for peak identification in software.                                                                                                                        | Abuawad et al., 2020. PMID: 32114632.                                                                             |
| <b>Intracellular Cytokine Staining (ICS) by flow cytometry</b>                  | Protein abundance        |  | Single cell snapshot | Multi-analyte                                     | Relative quantitation (protein abundance/cell), absolute quantitation (portion of cells expressing specific protein)                        | Flow cytometer, specific antibodies against proteins of interest required; need to identify time point, to optimize permeabilization procedure.                                                  | Fluorescence compensation if using multi-color panel, gating strategies and multi-dimensional analysis.                                                                           | Lovelace and Maecker, 2018, PMID: 29071680.                                                                       |
| <b>Enzyme-linked Immunosorbent Assay (ELISA)</b>                                | Cytokine secretion       |  | Bulk                 | Single analyte                                    | Relative quantitation, absolute quantitation of cytokine concentration possible using standard.                                             | Relatively expensive; plate reader required; antibodies or ready-made ELISA kit for cytokine of interest required.                                                                               | Analysis is generally not very challenging.                                                                                                                                       | Chiswick et al., 2012, PMID: 22262432.                                                                            |
| <b>Enzyme-linked Immunospot (ELISPOT) assay</b>                                 | Cytokine secretion       |  | Single cell snapshot | Single analyte, (multianalyte possible)           | Absolute quantitation of number of cells secreting cytokine of interest.                                                                    | Relatively expensive; antibodies against cytokine of interest required; cell health during incubation time.                                                                                      | Analysis is generally not very challenging.                                                                                                                                       | Kouwenhoven et al., 2001, PMID: 11687471.                                                                         |
| <b>LUMINEX®</b>                                                                 | Cytokine secretion       |  | Bulk                 | Multi-analyte                                     | Relative quantitation, absolute quantitation possible using standard; large dynamic range.                                                  | LUMINEX® instrument required; expensive kits; kit for desired analyte needs to be available.                                                                                                     | Analysis is generally not very challenging.                                                                                                                                       | Surenaud et al., 2016, PMID: 27835944.                                                                            |

# Common Perturbation Approaches for the Study of Immune Response Signaling Networks (1/1)

| Perturbation                                                                         | Purpose                                                                                                                   | Features                                                                                                                                                                                                                                                                                                                              | Challenges                                                                                                                                                                                                                                                                                                                                    | Example protocol or study reference                                                                               |
|--------------------------------------------------------------------------------------|---------------------------------------------------------------------------------------------------------------------------|---------------------------------------------------------------------------------------------------------------------------------------------------------------------------------------------------------------------------------------------------------------------------------------------------------------------------------------|-----------------------------------------------------------------------------------------------------------------------------------------------------------------------------------------------------------------------------------------------------------------------------------------------------------------------------------------------|-------------------------------------------------------------------------------------------------------------------|
| <b>Pharmacological inhibitors</b>                                                    | Reduce enzymatic activity, or block protein-protein interactions                                                          | <ul style="list-style-type: none"> <li>- Easy to administer</li> <li>- Usually transient effect, with defined <math>t = 0</math></li> <li>- Usually high efficiency if using established inhibitor</li> </ul>                                                                                                                         | <ul style="list-style-type: none"> <li>- Cytotoxicity depending on concentration, target, and solvent</li> <li>- Significant off-target effects a common problem, depends on available inhibitors, requires careful controls</li> </ul>                                                                                                       | Van den Blink et al., 2001, PMID: 11123340.<br>Greten et al., 2007, PMID: 17803913.                               |
| <b>RNA interference by siRNA, often delivered by transfection or electroporation</b> | Reduce protein production                                                                                                 | <ul style="list-style-type: none"> <li>- Easy to implement</li> <li>- Strength of knockdown can be titrated</li> <li>- Transient effect, but timecourse not well defined</li> </ul>                                                                                                                                                   | <ul style="list-style-type: none"> <li>- Off-target effects require controls, such as suppressing the phenotype by complementary expression of an siRNA-resistant variant</li> <li>- May activate type I IFN</li> <li>- Effect may be cell-to-cell heterogeneous</li> </ul>                                                                   | Birmingham et al., 2007, PMID: 17853862.<br>Troeger et al., 2014, PMID: 24890643.                                 |
| <b>RNA interference by shRNA, often vector-based delivery by viral transduction</b>  | Reduce protein production                                                                                                 | <ul style="list-style-type: none"> <li>- Permanent knockdown through genomic integration possible</li> <li>- Inducible knockdown systems available</li> <li>- Viral transduction often well tolerated</li> </ul>                                                                                                                      | <ul style="list-style-type: none"> <li>- Off-target effects require controls, such as suppressing the phenotype by complementary expression of an shRNA-resistant variant</li> <li>- May activate type I IFN</li> <li>- May require selection of cell clone to avoid heterogeneity</li> </ul>                                                 | Moore et al., 2013, PMID: 20387148.                                                                               |
| <b>Traditional knockout in mice (or DT40 cell line)</b>                              | Eliminate expression                                                                                                      | <ul style="list-style-type: none"> <li>- Permanent and complete</li> <li>- Perfectly specific for gene of interest</li> <li>- Conditional/ organ-specific knockouts possible</li> <li>- Inducible knockout possible</li> </ul>                                                                                                        | <ul style="list-style-type: none"> <li>- Genetic compensation by family members may mask true function</li> <li>- Embryonic lethality may be a problem</li> <li>- Long and expensive process, low efficiency</li> </ul>                                                                                                                       | Hall et al., 2010, PMID: 19731224.                                                                                |
| <b>CRISPR knockout</b>                                                               | Eliminate expression                                                                                                      | <ul style="list-style-type: none"> <li>- Easy to design and implement compared to traditional knockout</li> <li>- Many design and delivery options available</li> <li>- Avoids embryonic lethality if cell type of interest tolerates loss of protein</li> <li>- Permanent knockout</li> <li>- Inducible knockout possible</li> </ul> | <ul style="list-style-type: none"> <li>- Genetic compensation by family members may mask true function</li> <li>- Off target effects possible, can be reduced by careful design, but when clonal analysis is needed, multiple clones are required</li> <li>- Often relatively low efficiency</li> <li>- May result in cytotoxicity</li> </ul> | Ran et al., 2013, PMID: 24157548.<br>Giuliano, et al., 2019, PMID: 31503414.                                      |
| <b>Modulation of gene expression via catalytically inactive CRISPR variants</b>      | Transcriptionally activate or repress target gene without altering protein coding sequence                                | <ul style="list-style-type: none"> <li>- Applicable also to non-coding RNA expression</li> <li>- CRISPRa: allows overexpression of endogenous genes</li> <li>- Inducible designs available</li> </ul>                                                                                                                                 | <ul style="list-style-type: none"> <li>- Off targets effects possible, depend on design of guide RNA</li> <li>- Designing guide RNA targeting transcriptional start site can be difficult (accessibility, promoter use, lack of annotation)</li> </ul>                                                                                        | Qi et al., 2013, PMID: 23452860.<br>Konerman et al., 2015, PMID: 25494202.<br>Joung et al., 2017, PMID: 28333914. |
| <b>Transient Transfection</b>                                                        | Overexpress signal transducer or transdominant inhibitory mutant, introduce tagged or mutated genes, complement knockout. | <ul style="list-style-type: none"> <li>- Easy to implement in some cell lines</li> <li>- Expression starts within 12-24 h after transfection, reverses over time in most cells</li> <li>- Expression levels can be titrated</li> </ul>                                                                                                | <ul style="list-style-type: none"> <li>- Works well for some cell lines, but not for all, and rarely for primary cells</li> <li>- Cell-to-cell heterogeneity of expression</li> <li>- May activate type I IFN</li> </ul>                                                                                                                      | Kim et al., 2010, PMID: 20549496.<br>Longo et al., 2014, PMID: 24011049.<br>Zhang et al., 2010, PMID: 19347315.   |
| <b>Stable Transfection</b>                                                           | As above                                                                                                                  | <ul style="list-style-type: none"> <li>- Permanent genomic integration</li> <li>- Cloning and/or selection used to achieve pure cell population</li> <li>- Inducible expression systems available</li> </ul>                                                                                                                          | <ul style="list-style-type: none"> <li>- Random genomic integration may disrupt gene functions</li> <li>- Epigenetic silencing may occur</li> <li>- Low efficiency, and long time required to grow pure population</li> <li>- Cell health depends on nature of protein expressed</li> </ul>                                                   | Zhang et al., 2010, PMID: 19347315.                                                                               |
| <b>Viral Transduction (e.g. lenti- or retroviruses)</b>                              | As above                                                                                                                  | <ul style="list-style-type: none"> <li>- Ensures long-lasting expression</li> <li>- Cloning and/or selection used to achieve pure cell population</li> <li>- Inducible expression systems available</li> </ul>                                                                                                                        | <ul style="list-style-type: none"> <li>- Epigenetic silencing may occur</li> <li>- Cell health depends on nature of protein expressed</li> <li>- Random genomic integration may disrupt unrelated gene functions, so when a clonal analysis is needed, multiple clones are required</li> </ul>                                                | Leyva et al., 2011, PMID: 21281514.<br>Zhang et al., 2010, PMID: 19347315.                                        |
| <b>CRISPR Knockin</b>                                                                | Mutate or tag endogenous genes                                                                                            | <ul style="list-style-type: none"> <li>- Targeted alterations of genes in endogenous locus possible</li> <li>- Permanent alteration of gene</li> <li>- Selection/cloning/sorting results in pure cell population</li> </ul>                                                                                                           | <ul style="list-style-type: none"> <li>- Low efficiency, sometimes difficult to select successful event</li> <li>- Careful design necessary</li> <li>- Delivery of protein/nucleic acid may not work for all cells</li> </ul>                                                                                                                 | Koch et al., 2018, PMID: 29844520.                                                                                |

# Regulatory motifs in innate immune signaling networks (1/5)

| Motif                           | Diagram | Equation                                                                  | Simulations | Description                                                                                                                                                                                                                                                                                                                                                                                                                                                                           | Examples                                                                                                                                                       |
|---------------------------------|---------|---------------------------------------------------------------------------|-------------|---------------------------------------------------------------------------------------------------------------------------------------------------------------------------------------------------------------------------------------------------------------------------------------------------------------------------------------------------------------------------------------------------------------------------------------------------------------------------------------|----------------------------------------------------------------------------------------------------------------------------------------------------------------|
| 1.1.<br>2-state toggle switches |         | $\frac{dP}{dt} = k_1 A - k_0 I(t) P$ $\frac{dA}{dt} = k_0 I(t) P - k_1 A$ |             | <b>Simple two-state toggle switch</b> <ul style="list-style-type: none"> <li>• <b>P (poised state)</b></li> <li>• <b>A (active state)</b></li> <li>• The incoming signal ("Input") enhances the forward reaction</li> <li>• Dotted line: strength of the input signal</li> <li>• Orange line: amplitude of the output</li> <li>• <math>k_1</math>: the reverse reaction that controls output amplitude. As <math>k_1</math> increases, the sensitivity to input decreases.</li> </ul> | <b>Kinase – phosphatase toggle:</b><br>Phosphatase PP2A terminates transcription factor IRF3 activity when kinase activity has diminished (Long et al., 2014). |

|                               |  |                                                                                                           |  |                                                                                                                                                                                                                                                                                                                                                                                                                                                                                                                                                                                                                                                           |                                                                                                                                                                                                                                                                                                                                                                                                                          |
|-------------------------------|--|-----------------------------------------------------------------------------------------------------------|--|-----------------------------------------------------------------------------------------------------------------------------------------------------------------------------------------------------------------------------------------------------------------------------------------------------------------------------------------------------------------------------------------------------------------------------------------------------------------------------------------------------------------------------------------------------------------------------------------------------------------------------------------------------------|--------------------------------------------------------------------------------------------------------------------------------------------------------------------------------------------------------------------------------------------------------------------------------------------------------------------------------------------------------------------------------------------------------------------------|
| 1.2.<br>3-state switch cycles |  | $\frac{dP}{dt} = k_2 U - k_0 I(t) P$ $\frac{dA}{dt} = k_0 I(t) P - k_1 A$ $\frac{dU}{dt} = k_1 A - k_2 U$ |  | <b>Three-state cycles</b> <ul style="list-style-type: none"> <li>• <b>P (poised state)</b></li> <li>• <b>A (active state)</b></li> <li>• <b>U (unavailable)</b></li> <li>• The forward reaction predominates over backwards reactions.</li> <li>• The molecule cycles from P to A to U, before returning to P. The intermediate unavailable pool U leads to a dynamically transient response for a persistent signal. The active species A becomes trapped in the U pool, thereby generating a pulse-like transient response.</li> <li>• As the recycling rate <math>k_2</math> increases, the cycle behavior becomes more toggle-switch-like.</li> </ul> | <b>Receptor recycling:</b><br>Slow reappearance of receptors at the cell surface after endocytosis or degradation leads to a refractory period. <ul style="list-style-type: none"> <li>• Receptors available for ligand binding at the surface are "poised" (P).</li> <li>• Bound receptors are "active" (A).</li> <li>• Receptors "unavailable" (U) are returned to the surface later (Becker et al., 2010).</li> </ul> |
|-------------------------------|--|-----------------------------------------------------------------------------------------------------------|--|-----------------------------------------------------------------------------------------------------------------------------------------------------------------------------------------------------------------------------------------------------------------------------------------------------------------------------------------------------------------------------------------------------------------------------------------------------------------------------------------------------------------------------------------------------------------------------------------------------------------------------------------------------------|--------------------------------------------------------------------------------------------------------------------------------------------------------------------------------------------------------------------------------------------------------------------------------------------------------------------------------------------------------------------------------------------------------------------------|

|                                    |  |                                                                                                                                                                                                                                                                                                                                                                                                                                |  |                                                                                                                                                                                                                                                                                                                                                                                                                                                                                                                                                                                                                                                                                                                                                                                                                                         |                                                                                                                                                                                                                                                                                                                                                                                                         |
|------------------------------------|--|--------------------------------------------------------------------------------------------------------------------------------------------------------------------------------------------------------------------------------------------------------------------------------------------------------------------------------------------------------------------------------------------------------------------------------|--|-----------------------------------------------------------------------------------------------------------------------------------------------------------------------------------------------------------------------------------------------------------------------------------------------------------------------------------------------------------------------------------------------------------------------------------------------------------------------------------------------------------------------------------------------------------------------------------------------------------------------------------------------------------------------------------------------------------------------------------------------------------------------------------------------------------------------------------------|---------------------------------------------------------------------------------------------------------------------------------------------------------------------------------------------------------------------------------------------------------------------------------------------------------------------------------------------------------------------------------------------------------|
| 2.<br>Multi-step reaction cascades |  | $\frac{k_f}{k_b} = \frac{C^n}{K_D^n + C^n}$ $\frac{dC}{dt} = k_b C_1 M_1 - k_f C_1 M_1 + 3k_f C_3 M_3$ $\frac{dM}{dt} = k_b C_1 M_1 - k_f C_1 M_1 + 3k_b M_3$ $\frac{dC_1 M_1}{dt} = k_f C M - 2k_f C_1 M_1 C_1 M_1 - k_b C_1 M_1 - k_f C_2 M_2 C_1 M_1$ $\frac{dC_2 M_2}{dt} = k_f C_1 M_1 C_1 M_1 - k_f C_2 M_2 C_1 M_1$ $\frac{dC_3 M_3}{dt} = k_f C_2 M_2 C_1 M_1 - k_f C_3 M_3$ $\frac{dM_3}{dt} = k_f C_3 M_3 - k_b M_3$ |  | <b>Multistep reaction cascades</b> <ul style="list-style-type: none"> <li>• Hill function-like ultra-sensitivity</li> <li>• Increasing <math>\frac{k_f}{k_b}</math> approximates a Hill function with increasing Hill coefficient <math>n</math>.</li> <li>• A multistep mechanistic model can suggest the molecular mechanisms behind a Hill function approximation.</li> <li>• To model e.g. oligomerization, monomers (M) dimerize when receptor-ligand complex (C) forms. The input dose (C) accelerates the multiple forward reactions.</li> <li>• The first aggregated complex <math>C_2 M_2</math> then aggregates again, with forward rate <math>k_f</math>, up to the most aggregated form, here called <math>C_3 M_3</math>. The reverse rate <math>k_b</math> is the dissociation of the oligomers into monomers.</li> </ul> | <b>Examples of multistep reaction cascades:</b> <ul style="list-style-type: none"> <li>• Receptor-ligand binding</li> <li>• Kinase cascades (MAPK)</li> <li>• Signal adapter oligomerization (e.g. MyD88 and MAVS)</li> </ul> <p>The multistep process generates digital rather than linear dose response curves, as shown by the sequential oligomerization of the Myddosome (Cheng et al., 2015).</p> |
|------------------------------------|--|--------------------------------------------------------------------------------------------------------------------------------------------------------------------------------------------------------------------------------------------------------------------------------------------------------------------------------------------------------------------------------------------------------------------------------|--|-----------------------------------------------------------------------------------------------------------------------------------------------------------------------------------------------------------------------------------------------------------------------------------------------------------------------------------------------------------------------------------------------------------------------------------------------------------------------------------------------------------------------------------------------------------------------------------------------------------------------------------------------------------------------------------------------------------------------------------------------------------------------------------------------------------------------------------------|---------------------------------------------------------------------------------------------------------------------------------------------------------------------------------------------------------------------------------------------------------------------------------------------------------------------------------------------------------------------------------------------------------|

# Regulatory motifs in innate immune signaling networks (2/5)

| Motif                                                                         | Diagram                                                                            | Equation                                                             | Simulations                                                                         | Description                                                                                                                                                                                                                                                                                                                                                                                                                                                                                                                                                                                                                                                        | Examples                                                                                                                                                                                                                                                                                                                                                                                                                                                                                                                                                                                                                                                                                                                                                                                                                       |
|-------------------------------------------------------------------------------|------------------------------------------------------------------------------------|----------------------------------------------------------------------|-------------------------------------------------------------------------------------|--------------------------------------------------------------------------------------------------------------------------------------------------------------------------------------------------------------------------------------------------------------------------------------------------------------------------------------------------------------------------------------------------------------------------------------------------------------------------------------------------------------------------------------------------------------------------------------------------------------------------------------------------------------------|--------------------------------------------------------------------------------------------------------------------------------------------------------------------------------------------------------------------------------------------------------------------------------------------------------------------------------------------------------------------------------------------------------------------------------------------------------------------------------------------------------------------------------------------------------------------------------------------------------------------------------------------------------------------------------------------------------------------------------------------------------------------------------------------------------------------------------|
| <b>3. Boolean logic gates</b><br><br><b>3.1 Boolean logic gates: AND gate</b> | 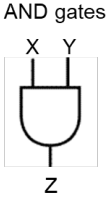  | $G(t) = \frac{S_1^n}{K_1^n + S_1^n} \frac{S_2^n}{K_2^n + S_2^n}$     |   | <b>AND gates reflect synergistic (super-additive) behavior</b> <ul style="list-style-type: none"> <li>Modeled by the product of two or more Hill functions that represent the activity of a <b>species (S)</b> (transcription factors, kinases, etc.)</li> <li><math>K_1</math> and <math>K_2</math> are the dissociation constants reflecting each species' binding affinity to the target.</li> <li>When both species concentrations are high, the output <math>G(t)</math> approaches 1.</li> <li>When either species concentration is low, the dissociation constant in the denominator dominates, and the output <math>G(t)</math> becomes low.</li> </ul>    | <b>Logic gates in signaling:</b> <ul style="list-style-type: none"> <li>IKK activation by TAK1-dependent and -independent mechanisms</li> </ul> <b>Logic gates in gene transcription:</b> <ul style="list-style-type: none"> <li>Combinatorial control of gene promoters by <i>AND</i> and <i>OR</i> gates (Cheng et al., 2017).</li> <li>For any particular mRNA:                             <math display="block">\frac{dmRNA}{dt} = k_{syn}G(t) - k_{deg}mRNA.</math>                             Synthesis term depends on the logic gate <math>G(t)</math>.                         </li> </ul> <b>AND gates in gene regulation:</b> <ul style="list-style-type: none"> <li>TNF is transcribed by NFκB AND post-transcriptionally stabilized by MAPK-p38 activity (sequential AND gate). (Cheng et al., 2017)</li> </ul> |
| <b>3.2 Boolean logic gates: OR gate</b>                                       |  | $G(t) = 1 - \frac{K_1^n}{K_1^n + S_1^n} \frac{K_2^n}{K_2^n + S_2^n}$ |  | <b>OR gates reflect redundant (sub-additive) behavior</b> <ul style="list-style-type: none"> <li>Intuition behind the <i>OR</i> gate equation is that the response to an activating species can be modeled by Hill function <math>\frac{S_i^n}{K_i^n + S_i^n}</math>, representing the probability that species S is bound.</li> <li>The probability of not bound is <math>1 - \frac{S_i^n}{K_i^n + S_i^n}</math>, which can be rewritten as <math>\frac{K_i^n}{K_i^n + S_i^n}</math>.</li> <li>In an <i>OR</i> gate, there is activity unless both species are not bound, or <math>1 - \frac{K_1^n}{K_1^n + S_1^n} \frac{K_2^n}{K_2^n + S_2^n}</math>.</li> </ul> | <b>OR gates in gene regulation:</b> <ul style="list-style-type: none"> <li>NFκB and ISGF3 activity form a sequential OR gate, allowing sustained responses for a cluster of about 100 macrophage immune response genes (Cheng et al., 2017).</li> </ul>                                                                                                                                                                                                                                                                                                                                                                                                                                                                                                                                                                        |

# Regulatory motifs in innate immune signaling networks (3/5)

| Motif                                       | Diagram                                                      | Equation                                                                                                                                                                                                                                                                             | Simulations                                                                                                                                                                             | Description                                                                                                                                                                                                                                                                                                                                                                                                                                                                                                                                                                                                                                                                                                                                                                                                                                        | Examples                                                                                                                                                         |
|---------------------------------------------|--------------------------------------------------------------|--------------------------------------------------------------------------------------------------------------------------------------------------------------------------------------------------------------------------------------------------------------------------------------|-----------------------------------------------------------------------------------------------------------------------------------------------------------------------------------------|----------------------------------------------------------------------------------------------------------------------------------------------------------------------------------------------------------------------------------------------------------------------------------------------------------------------------------------------------------------------------------------------------------------------------------------------------------------------------------------------------------------------------------------------------------------------------------------------------------------------------------------------------------------------------------------------------------------------------------------------------------------------------------------------------------------------------------------------------|------------------------------------------------------------------------------------------------------------------------------------------------------------------|
| <b>4. Coherent feedforward loops (FFLs)</b> | <p><b>Coherent FFL:</b></p> <p><b>Direct activation:</b></p> | $\frac{dY}{dt} = k_{synY} f_x(t) - k_{degY} Y$ $\frac{dZ}{dt} = k_{synZ} f_x(t) f_y(t) - k_{degZ} Z$ <p>with activating Hill input functions for both <math>f_x(t)</math> and <math>f_y(t)</math>:</p> $f_x(t) = \frac{X(t)^n}{K^n + X(t)^n}$ $f_y(t) = \frac{Y(t)^n}{K^n + Y(t)^n}$ | <p><b>Coherent feedforward loop:</b></p> <p>Long duration input</p> <p>Short duration input</p> <p><b>Direct activation:</b></p> <p>Long duration input</p> <p>Short duration input</p> | <p><b>Coherent feedforward loop (type 1) (duration decoder):</b></p> <p>Occurs when a signal splits into two branches that then combine again through an AND gate.</p> <ul style="list-style-type: none"> <li>X induces the production of Y,</li> <li>Y then promotes the production of Z.</li> <li>X also directly promotes the production of Z, but cannot activate Z alone, since it operates in an AND gate with Y.</li> </ul> <p>Thus, Y needs to be present in sufficient amounts for production of Z, resulting in a delay in production of Z.</p> <p>For direct activation, Z is produced under both long and short duration inputs.</p> <p>For the coherent feedforward motif, if X is transient, Z may not be produced, as the indirect path (via Y) may be delayed vis-à-vis the direct path. The motif is thus a duration decoder.</p> | <p><b>Expression of I/I6:</b></p> <ul style="list-style-type: none"> <li>Requires binding of both NFκB and NFκB-induced C/EPB6 (Litvak et al., 2009).</li> </ul> |

|                                              |                                                                                                                                                                                                                                               |                                                                                                                                                                                   |                                                                             |                                                                                                                                                                                                                                                                                                                                                                                                                                                                                                                                                                                                                                                                                                                                                                                    |                                                                                                                                                                                                                      |
|----------------------------------------------|-----------------------------------------------------------------------------------------------------------------------------------------------------------------------------------------------------------------------------------------------|-----------------------------------------------------------------------------------------------------------------------------------------------------------------------------------|-----------------------------------------------------------------------------|------------------------------------------------------------------------------------------------------------------------------------------------------------------------------------------------------------------------------------------------------------------------------------------------------------------------------------------------------------------------------------------------------------------------------------------------------------------------------------------------------------------------------------------------------------------------------------------------------------------------------------------------------------------------------------------------------------------------------------------------------------------------------------|----------------------------------------------------------------------------------------------------------------------------------------------------------------------------------------------------------------------|
| <b>5. Incoherent FFLs</b>                    | <p><b>Incoherent feedforward loop (type 1):</b></p> <p>Occurs when a signal splits into two branches that then combine again through an AND gate. However, the indirect path functions to inhibit the positive effect of the direct path.</p> |                                                                                                                                                                                   |                                                                             |                                                                                                                                                                                                                                                                                                                                                                                                                                                                                                                                                                                                                                                                                                                                                                                    |                                                                                                                                                                                                                      |
| <b>5.1. Incoherent FFLs: Pulse generator</b> | <p><b>Incoherent FFL:</b></p> <p><b>Direct activation:</b></p>                                                                                                                                                                                | $\frac{dY}{dt} = k_{synY} f_x(t) - k_{degY} Y$ $\frac{dZ}{dt} = k_{synZ} (f_x(t) f_y(t)) - k_{degZ} Z$ $f_x(t) = \frac{X(t)^n}{K^n + X(t)^n}$ $f_y(t) = \frac{K^n}{K^n + Y(t)^n}$ | <p><b>Incoherent feedforward loop:</b></p> <p><b>Direct activation:</b></p> | <p><b>Incoherent FFL:</b></p> <ul style="list-style-type: none"> <li>X promotes production of Y and Z, but production of Y represses the production of Z.</li> <li>The action of X on Y and Z can be modeled with an activating Hill function for <math>f_x(t)</math>.</li> <li>The action of Y on Z can be modeled with a repressive Hill function for <math>f_y(t)</math> (rather than activating as in the coherent feedforward case).</li> </ul> <p><b>Incoherent FFL (pulse generator):</b></p> <ul style="list-style-type: none"> <li>An incoherent FFL acts as a pulse generator for Z.</li> <li>Initial production by X is dampened as the X-induced production of Y increases.</li> <li>When X is high, increased production of Y dampens overproduction of Z.</li> </ul> | <p><b>Controlling overproduction of inflammatory cytokines:</b></p> <ul style="list-style-type: none"> <li>NFκB-induced ATF3 represses NFκB-induced expression of IL6 and IL12B (Gilchrist et al., 2006).</li> </ul> |

|                                                   |                                                                                                                                                                                                                                                                                                                                                                                                                                              |                                                              |                                                                                                                                                 |                                                                                                                                                                                                                                                                                                             |  |
|---------------------------------------------------|----------------------------------------------------------------------------------------------------------------------------------------------------------------------------------------------------------------------------------------------------------------------------------------------------------------------------------------------------------------------------------------------------------------------------------------------|--------------------------------------------------------------|-------------------------------------------------------------------------------------------------------------------------------------------------|-------------------------------------------------------------------------------------------------------------------------------------------------------------------------------------------------------------------------------------------------------------------------------------------------------------|--|
| <b>5.2. Incoherent FFLs: Fold Change Detector</b> | <p><b>Incoherent FFL (fold change detector):</b></p> <p>If basal levels of Y are already high, then X's activation effect on Z is dampened, even when absolute abundance of X is high.</p> <p>Whereas simple direct activation of Z by X is solely a function of the amplitude of X, the incoherent feedback motif is also a function of the basal level of X such that peak activity of Z is more proportional to the fold change in X.</p> |                                                              |                                                                                                                                                 |                                                                                                                                                                                                                                                                                                             |  |
|                                                   | <p><b>Low fold change</b></p> <p><b>High fold change</b></p>                                                                                                                                                                                                                                                                                                                                                                                 | <p><b>Low fold change</b></p> <p><b>High fold change</b></p> | <p><b>Incoherent feedforward loop:</b></p> <p><math>X(t=1000) = 1</math></p> <p><b>Direct activation:</b></p> <p><math>X(t=1000) = 1</math></p> | <p><b>NFκB-induced transcription:</b></p> <ul style="list-style-type: none"> <li>NFκB induction of a transcriptionally incompetent competitor (p50:50 homodimer) inhibits NFκB-induced gene activation.</li> <li>It thus provides memory of the cell's pre-stimulation state (Lee et al., 2014).</li> </ul> |  |

# Regulatory motifs in innate immune signaling networks (4/5)

| Motif                                                    | Diagram | Equation                                                                                                                                                                                                                                                | Simulations | Description                                                                                                                                                                                                                                                                                                                                                                                                                                                                                                                                                                     | Examples                                                                                                                                                                                                                                                                                                      |
|----------------------------------------------------------|---------|---------------------------------------------------------------------------------------------------------------------------------------------------------------------------------------------------------------------------------------------------------|-------------|---------------------------------------------------------------------------------------------------------------------------------------------------------------------------------------------------------------------------------------------------------------------------------------------------------------------------------------------------------------------------------------------------------------------------------------------------------------------------------------------------------------------------------------------------------------------------------|---------------------------------------------------------------------------------------------------------------------------------------------------------------------------------------------------------------------------------------------------------------------------------------------------------------|
| 6. Positive feedback loops                               |         | $\frac{dY}{dt} = k_{synY} \frac{Z}{K + Z} - k_{degY} Y$ $\frac{dZ}{dt} = k_{synZ} X \left( 1 - \frac{K}{K + I(t)} \frac{K}{K + Y} \right) - k_{degZ} Z$ $\frac{dX}{dt} = k_{degX} Z - k_{synX} X \left( 1 - \frac{K}{K + I(t)} \frac{K}{K + Y} \right)$ |             | <p><b>Positive feedback motif:</b></p> <ul style="list-style-type: none"> <li>The Input signal produces Z,</li> <li>Z then produces its positive feedback regulator Y, which continues to promote the production of Z even after the input signal has gone.</li> </ul>                                                                                                                                                                                                                                                                                                          |                                                                                                                                                                                                                                                                                                               |
| 6.1. Positive feedback loops:<br><b>Ultrasensitivity</b> |         |                                                                                                                                                                                                                                                         |             | <p><b>Ultrasensitivity (a feature of positive feedback motifs):</b></p> <ul style="list-style-type: none"> <li>The Input signal produces Z; positive feedback loops reinforce the activity of the signal</li> <li>The dose-response curve is ultrasensitive, or thresholded with a high Hill coefficient.</li> <li>The strength of the positive feedback determines the threshold and steepness of the dose response curve.</li> </ul>                                                                                                                                          | <p><b>Stimulus-response:</b></p> <ul style="list-style-type: none"> <li>Positive feedback loops providing ultrasensitivity may filter out low-input noise, while triggering complete activation when a threshold is reached (Shinohara et al., 2014).</li> </ul>                                              |
| 6.2. Positive feedback loops:<br><b>Bistability</b>      |         |                                                                                                                                                                                                                                                         |             | <p><b>Bistability (a feature of positive feedback motifs):</b></p> <ul style="list-style-type: none"> <li>In contrast to the toggle switch, which loses activity once the input signal is gone, positive feedback motifs allow for bistability.</li> <li>The on-state remains stable, even after the incoming signal has terminated.</li> <li>One can describe the system as having two different attractor steady states, as is illustrated below with the on-state being reached even if the signal is terminated after only partial activation has been achieved.</li> </ul> | <p><b>Signaling by caspase 8/3:</b></p> <ul style="list-style-type: none"> <li>Cleaved and hence active caspase will trigger downstream effects, but also generate more active caspase.</li> <li>This contributes to the irreversibility of programmed cell death decisions (Eissing et al, 2004).</li> </ul> |



# Regulatory motifs in innate immune signaling networks (5/5)

| Motif                                                                      | Diagram | Equation                                                                                                                                                                                     | Simulation | Description                                                                                                                                                                                                                                                                                                                                                                                                                                                                                                                                                                                                                                                                                                                                                                                                                                                        | Examples                                                                                                                                                                                                                                                                                                                                                                                                                                                                                                                                                |
|----------------------------------------------------------------------------|---------|----------------------------------------------------------------------------------------------------------------------------------------------------------------------------------------------|------------|--------------------------------------------------------------------------------------------------------------------------------------------------------------------------------------------------------------------------------------------------------------------------------------------------------------------------------------------------------------------------------------------------------------------------------------------------------------------------------------------------------------------------------------------------------------------------------------------------------------------------------------------------------------------------------------------------------------------------------------------------------------------------------------------------------------------------------------------------------------------|---------------------------------------------------------------------------------------------------------------------------------------------------------------------------------------------------------------------------------------------------------------------------------------------------------------------------------------------------------------------------------------------------------------------------------------------------------------------------------------------------------------------------------------------------------|
| <b>7. Negative feedback loops</b>                                          |         | $\frac{dY}{dt} = k_{synY_0} + k_{synY}Z(t - \tau) - k_{degY_2}Y$ $\frac{dZ}{dt} = k_{synZ}I(t)X - k_{degZY}ZY - k_{degZ}Z$ $\frac{dX}{dt} = k_{degZY}ZY + k_{degZ}Z - k_{synZ}I(t)X$         |            | <ul style="list-style-type: none"> <li>• <b>Basic formulation:</b> an activating input signal converts X to Z. Z produces its own inhibitor Y. Y then promotes the transition of the active state Z back to an inactive form X.</li> <li>• This simple motif is capable of numerous functional responses that depend on the quantitative characteristics of the components and their connections (see below).</li> </ul>                                                                                                                                                                                                                                                                                                                                                                                                                                           |                                                                                                                                                                                                                                                                                                                                                                                                                                                                                                                                                         |
| <b>7.1. Negative feedback loops: Track input duration</b>                  |         |                                                                                                                                                                                              |            | <ul style="list-style-type: none"> <li>• Feedback may ensure that the output is only active so long as there is an input signal.</li> <li>• In response to transient inputs, Z will track the duration of the input.</li> <li>• When feedback is low or absent, it takes longer for Z to return to baseline.</li> </ul>                                                                                                                                                                                                                                                                                                                                                                                                                                                                                                                                            | SOCS proteins regulating IRF/ISGF3 responses (Liu et al., 2015).                                                                                                                                                                                                                                                                                                                                                                                                                                                                                        |
| <b>7.2. Negative feedback loops: Improve Responsiveness</b>                |         |                                                                                                                                                                                              |            | <ul style="list-style-type: none"> <li>• In principle, a high reverse reaction rate will allow the effector Z to track the transient input, but the responsiveness of Z suffers.</li> <li>• Hence in scenarios where both the feedback and no-feedback systems are able to track transient input, the negative feedback allows improved responsiveness.</li> </ul>                                                                                                                                                                                                                                                                                                                                                                                                                                                                                                 | NFκB-IκBα (Hoffmann et al., 2002, Kearns et al., 2006).                                                                                                                                                                                                                                                                                                                                                                                                                                                                                                 |
| <b>7.3. Negative feedback loops: Pulse generator</b>                       |         |                                                                                                                                                                                              |            | <ul style="list-style-type: none"> <li>• When Y's inducibility involves a delay and its half-life is long, the negative feedback loop may shut down responses to a persistent input after an initial pulse.</li> <li>• Hence it may function as a pulse generator.</li> </ul>                                                                                                                                                                                                                                                                                                                                                                                                                                                                                                                                                                                      | NFκB negative feedback from delayed IκBδ expression (Shih et al., 2009).                                                                                                                                                                                                                                                                                                                                                                                                                                                                                |
| <b>7.4. Negative feedback loops: Oscillation generator</b>                 |         |                                                                                                                                                                                              |            | <ul style="list-style-type: none"> <li>• When Y's half-life is short, the same motif may lead to oscillations in response to a persistent input as the transiently induced Y decays rapidly to allow for a second pulse of activity.</li> <li>• The robustness of the oscillations depends on the delay <math>\tau</math>.</li> </ul>                                                                                                                                                                                                                                                                                                                                                                                                                                                                                                                              | A highly active inhibitory enzyme such as MAPK phosphatase can mediate oscillatory activity of MAPKp38 (Tomida et al., 2015).                                                                                                                                                                                                                                                                                                                                                                                                                           |
| <b>7.5. Negative feedback loops: Input-dependent oscillation generator</b> |         | $\frac{dY}{dt} = k_{synY_0} + k_{synY}Z(t - \tau) - k_{degY}I(t)Y - k_{degY_2}Y$ $\frac{dZ}{dt} = k_{synZ}X - k_{degZY}ZY - k_{degZ}Z$ $\frac{dX}{dt} = k_{degZY}ZY + k_{degZ}Z - k_{synZ}X$ |            | <ul style="list-style-type: none"> <li>• <b>A subclass of negative feedback loops</b> involve the input signal-induced destruction of the negative feedback inhibitor. In this case, the inhibitor Y has a long half-life.</li> <li>• In the absence of the input signal, Y has a long half-life such that Z is maintained in a low basal state and is rapidly attenuated when the signal ceases. However, when the input is active, the inhibitor Y is quickly degraded repeatedly, thus creating robust oscillations.</li> <li>• In this motif the strength of the oscillations is a function of the strength of the input signal: When the input signal is too high, it may counteract the negative feedback inhibitor before this has built up to produce a trough of activity. Instead of oscillations, a non-oscillatory second phase may result.</li> </ul> | <b>NFκB-IκBα negative feedback loop:</b> <ul style="list-style-type: none"> <li>• The inactive state X (cytoplasmic NFκB) toggles to an active state Z (nuclear NFκB), which induces the production of Y with a delay.</li> <li>• When there is a persistent inhibitory input signal on Y (IκBα) by IKK, this generates oscillations under large enough values of <math>\tau</math>.</li> <li>• However, when the input signal is high (in response to MyD88 pathways), then NFκB activity is largely non-oscillatory (Adelaja et al, 2021).</li> </ul> |
